# Supplementary material for: Engineering interconnected 3D vascular networks in hydrogels using molded sodium alginate lattice as the sacrificial template
Source: Royal Society of Chemistry journal article supplement (doi:10.1039/c4lc00069b), 2014-01-01
Supplement: c4lc00069b1.pdf [file c4lc00069b1.pdf]

Supplementary information for

**Engineering interconnected 3D vascular networks in hydrogels  
using molded sodium alginate lattice as the sacrificial templates**

Xue-Ying Wang<sup>&</sup>, Zi-He Jin<sup>&</sup>, Bo-Wen Gan, Song-Wei Lv,

Min Xie and Wei-Hua Huang<sup>\*</sup>

Key Laboratory of Analytical Chemistry for Biology and Medicine (Ministry of Education), College of Chemistry and Molecular Sciences, Wuhan University, Wuhan 430072, China.

<sup>&</sup> the two authors contributed equally to this work.

<sup>\*</sup>Corresponding author. E-mail address: [whhuang@whu.edu.cn](mailto:whhuang@whu.edu.cn)

Phone: 86 2768752149

Fax: 86 2768754067

**This file includes:**

Supplementary Fig.S1

**Other Supporting Online Material for this manuscript includes the following:**

Supplementary Movie 1

Supplementary Movie 2

Supplementary Movie 3

Supplementary Movie 4

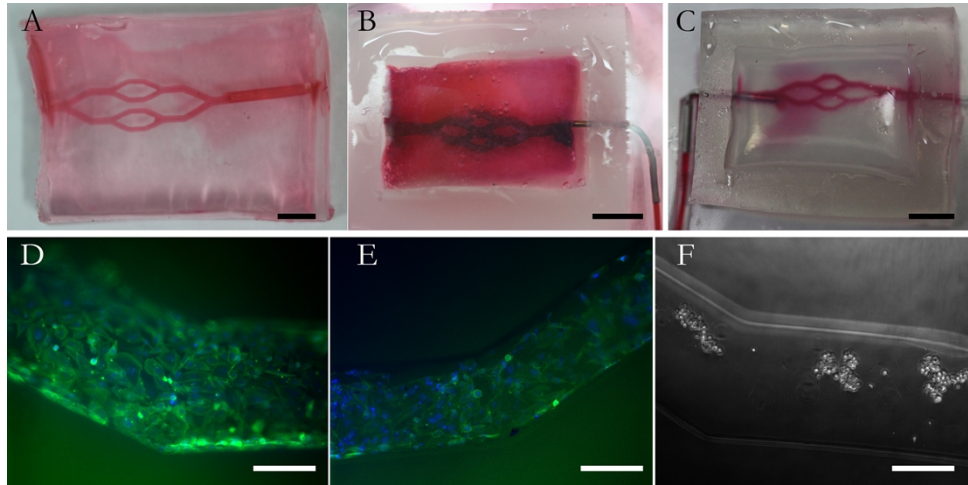

Fig.S1 Microfluidic channels in different matrix and cell cultured in channels.(A-C) Pictures of microfluidic channels in gelatin(A);collagen(B)and agarose(C); Fluorescence images of HUVECs cultured on the channels lining of gelatin(D);collagen(E) and agarose(F). Alexa Fluor 488 phalloidin (green), DAPI (blue). Scale bar: 2.0 mm(A-C); 200  $\mu\text{m}$ (D-F);

**Supplementary Movie 1.** The process of microfluidic networks filling with red dye.

**Supplementary Movie 2.** The flow of Rhodamine-labelled microspheres solution with the flow rate of  $200\mu\text{L}\cdot\text{h}^{-1}$  in monolayered microfluidic networks.

**Supplementary Movie 3.** The flow of Rhodamine-labelled microspheres solution with the flow rate of  $200\mu\text{L}\cdot\text{h}^{-1}$  in multilayered 3D microfluidic networks.

**Supplementary Movie 4.** Different layers of HUVECs cultured in gelatin channels after 3 days under static conditions.
